# Supplementary material for: Effect of exercise versus cognitive behavioural therapy or no intervention on anxiety, depression, fitness and quality of life in adults with previous methamphetamine dependency: a systematic review
Source: Springer Nature journal article supplement (doi:10.1186/s13722-018-0106-4), 2018-01-16
Supplement: MOESM4 [file 15368782]

## Additional file 4: Adapted Joanna Briggs Institute Data Extraction Form

| CITATION                                     |              |        |               |
|----------------------------------------------|--------------|--------|---------------|
| <b>Database:</b>                             |              |        |               |
| <b>Authors:</b>                              |              |        |               |
| <b>Title:</b>                                |              |        |               |
| <b>Publication date:</b>                     |              |        |               |
| <b>PEDro Score:</b>                          |              |        |               |
| <b>Journal:</b>                              | Journal:     |        |               |
|                                              | Volume:      | Issue: | Page numbers: |
| <b>Thesis / Dissertation:</b>                | Institution: |        |               |
| <b>Country where research was conducted:</b> |              |        |               |

| TYPE OF STUDY                                              |
|------------------------------------------------------------|
| <input type="checkbox"/> Randomised Controlled Trial       |
| <input type="checkbox"/> Quasi-randomised Controlled Trial |
| <input type="checkbox"/> Controlled Clinical Trial         |
| <input type="checkbox"/> Other:                            |

| PARTICIPANTS                   |                              |                             |            |
|--------------------------------|------------------------------|-----------------------------|------------|
| <b>Number of participants:</b> | Total:                       | Completed study:            | Withdrawn: |
| <b>Gender:</b>                 | Total ♂:                     | Total ♀:                    |            |
| <b>Randomized:</b>             | <input type="checkbox"/> Yes | <input type="checkbox"/> No |            |
| <b>Mean age:</b>               |                              |                             |            |

| INTERVENTION                                                            |                              |                             |                                    |
|-------------------------------------------------------------------------|------------------------------|-----------------------------|------------------------------------|
| <b>Intervention:</b> Educational-behavioural joint protection education | Description:                 |                             |                                    |
| <b>Comparison:</b> Conventional joint protection education              | Description:                 |                             |                                    |
| <b>Interventions adequately described:</b>                              | <input type="checkbox"/> Yes | <input type="checkbox"/> No | <input type="checkbox"/> Not clear |

| OUTCOME MEASURES                         |                   |           |              |
|------------------------------------------|-------------------|-----------|--------------|
| Outcome:                                 | Measurement tool: | Validity: | Reliability: |
| <input type="checkbox"/> Pain            |                   |           |              |
| <input type="checkbox"/> Function        |                   |           |              |
| <input type="checkbox"/> Quality of life |                   |           |              |
| <input type="checkbox"/> Other:          |                   |           |              |

| RESULTS: DICHOTOMOUS DATA |                                                                        |           |                                                           |           |
|---------------------------|------------------------------------------------------------------------|-----------|-----------------------------------------------------------|-----------|
| Outcome:                  | Intervention Group: Educational-behavioural joint protection education |           | Comparison Group: Conventional joint protection education |           |
|                           | Short term                                                             | Long term | Short term                                                | Long term |
| 1.                        |                                                                        |           |                                                           |           |
| 2.                        |                                                                        |           |                                                           |           |
| 3.                        |                                                                        |           |                                                           |           |
| 4.                        |                                                                        |           |                                                           |           |
| 5.                        |                                                                        |           |                                                           |           |

**RESULTS: CONTINUOUS DATA**

| Outcome: | Intervention Group: Educational-behavioural joint protection education<br>Mean and SD (number) |           | Comparison Group: Conventional joint protection education<br>Mean and SD (number) |           |
|----------|------------------------------------------------------------------------------------------------|-----------|-----------------------------------------------------------------------------------|-----------|
|          | Short term                                                                                     | Long term | Short term                                                                        | Long term |
| 1.       |                                                                                                |           |                                                                                   |           |
| 2.       |                                                                                                |           |                                                                                   |           |
| 3.       |                                                                                                |           |                                                                                   |           |
| 4.       |                                                                                                |           |                                                                                   |           |
| 5.       |                                                                                                |           |                                                                                   |           |

**CLINICAL STATUS AND IMPLICATION (AUTHOR'S CONCLUSIONS)**

|                                    |                                   |                                       |                                     |
|------------------------------------|-----------------------------------|---------------------------------------|-------------------------------------|
| Clinical status post intervention: | <input type="checkbox"/> Improved | <input type="checkbox"/> Deteriorated | <input type="checkbox"/> Consistent |
| Clinical implication:              |                                   |                                       |                                     |
| Author's conclusions:              |                                   |                                       |                                     |
