# Supplementary material for: Effect of exercise versus cognitive behavioural therapy or no intervention on anxiety, depression, fitness and quality of life in adults with previous methamphetamine dependency: a systematic review
Source: Addict Sci Clin Pract. 2018 Jan 16;13:4. doi: 10.1186/s13722-018-0106-4 (PMC5771022; doi:10.1186/s13722-018-0106-4)
Supplement: Supplementary file 1 — Additional file 1. Search strategy. Detailed search strategies, specifically developed for each database according its functions. [file 13722_2018_106_MOESM1_ESM.pdf]

## Additional file 1: Search Strategy

### *Pubmed*

#### *Limits applied to the database*

|                    |                              |
|--------------------|------------------------------|
| Type of search:    | Simple search                |
| Publication dates: | Inception to May 2017        |
| Publication types: | Randomised controlled trials |
| Population:        | Humans                       |
| Language:          | English                      |

#### *Search Terms*

|                                      |
|--------------------------------------|
| 1. Methamphetamine                   |
| 2. exercise OR physical activity     |
| 3. #1 AND #2                         |
| 4. depression OR depression outcomes |
| 5. #3 AND #4                         |
| 6. fitness measures                  |
| 7. #3 AND #6                         |

### *Cochrane Library*

#### *Limits applied to the database*

|                    |                              |
|--------------------|------------------------------|
| Type of search:    | Advanced search              |
| Publication type:  | Randomised controlled trials |
| Publication dates: | Inception to May 2017        |

#### *MeSH terms*

“Methamphetamine” [MeSH] AND “exercise” [MeSH]

### *Search Terms*

|                                       |
|---------------------------------------|
| 1. Methamphetamine [MeSH Major topic] |
| 2. exercise [MeSH]                    |
| 3. #1 AND #2                          |
| 4. depression [MeSH]                  |
| 5. anxiety [MeSH]                     |
| 6. #3 AND #4                          |
| 7. #3 AND #5                          |
| 8. fitness measures                   |
| 9. #3 AND #8                          |

### *Science Direct*

#### *Limits applied to the database*

Type of search: Simple and advanced search

Publication dates: Inception to May 2017

### *Search Terms*

|                                  |
|----------------------------------|
| 1. Methamphetamine               |
| 2. exercise OR physical activity |
| 3. #1 AND #2                     |
| 4. depression                    |
| 5. anxiety                       |
| 6. psychological disorders       |
| 7. #3 AND #4                     |
| 8. #3 AND #5                     |
| 9. #3 AND #6                     |
| 10. fitness measures             |
| 11. #3 AND #10                   |

## ***Ebsco Host: CINAHL, pre-CINAHL***

### ***Limits applied to the database***

Type of search: Advanced search

Publication dates: Inception to May 2017

Publication type: Randomised controlled trials

Language: English

### ***Search Terms***

|                                  |
|----------------------------------|
| 1. Methamphetamine               |
| 2. exercise OR physical activity |
| 3. #1 AND #2                     |
| 4. depression                    |
| 5. anxiety                       |
| 6. psychological disorders       |
| 7. #3 AND #4                     |
| 8. #3 AND #5                     |
| 9. #3 AND #6                     |
| 10. fitness measures             |
| 11. #3 AND #10                   |

## ***PEDro***

### ***Limits applied to the database***

Type of search: Advanced search

Publication dates: Inception to May 2017

Publication type: Randomised controlled trials

Randomised review

### ***Search Terms***

|                                  |
|----------------------------------|
| 1. Methamphetamine               |
| 2. exercise OR physical activity |
| 3. #1 AND #2                     |
| 4. depression                    |

|                            |
|----------------------------|
| 5. anxiety                 |
| 6. psychological disorders |
| 7. #3 AND #4               |
| 8. #3 AND #5               |
| 9. #3 AND #6               |
| 10. fitness measures       |
| 11. #3 AND #10             |

## ***Scopus***

### ***Limits applied to the database***

Type of search: Advanced search

Publication dates: Inception to May 2017

Publication type: Randomised controlled trials

Language: English

### ***Search Terms***

|                                  |
|----------------------------------|
| 1. Methamphetamine               |
| 2. exercise OR physical activity |
| 3. #1 AND #2                     |
| 4. depression                    |
| 5. anxiety                       |
| 6. psychological disorders       |
| 7. #3 AND #4                     |
| 8. #3 AND #5                     |
| 9. #3 AND #6                     |
| 10. fitness measures             |
| 11. #3 AND #10                   |

## ***MEDLINE - ProQuest***

### ***Limits applied to the database***

Type of search: Advanced search

Publication dates: Inception to May 2017

Publication type: Randomised controlled trials

Language: English

*Search Terms*

|                                       |
|---------------------------------------|
| 1. Methamphetamine [MeSH Major topic] |
| 2. exercise [MeSH]                    |
| 3. #1 AND #2                          |
| 4. depression                         |
| 5. anxiety                            |
| 6. psychological disorders            |
| 7. #3 AND #4                          |
| 8. #3 AND #5                          |
| 9. #3 AND #6                          |
| 10. fitness measures                  |
| 11. #3 AND #10                        |
