# Supplementary material for: Effect of exercise versus cognitive behavioural therapy or no intervention on anxiety, depression, fitness and quality of life in adults with previous methamphetamine dependency: a systematic review
Source: Addict Sci Clin Pract. 2018 Jan 16;13:4. doi: 10.1186/s13722-018-0106-4 (PMC5771022; doi:10.1186/s13722-018-0106-4)
Supplement: Supplementary file 2 — Additional file 2. The National Health and Medical Research Council (NHMRC) Evidence Hierarchy. The NHMRC Evidence Hierarchy summarised in tabular form. [file 13722_2018_106_MOESM2_ESM.pdf]

## Additional file 2: The National Health and Medical Research Council (NHMRC) Evidence Hierarchy

| Level   | Intervention                                                                                                                                                                                                                                             |
|---------|----------------------------------------------------------------------------------------------------------------------------------------------------------------------------------------------------------------------------------------------------------|
| I       | A systematic review of level I studies                                                                                                                                                                                                                   |
| II      | A randomized control trial                                                                                                                                                                                                                               |
| III - 1 | A pseudo-randomized controlled trial (i.e. alternate allocation or some other method)                                                                                                                                                                    |
| III - 2 | A comparative study with concurrent controls: <ol style="list-style-type: none"> <li>1. Non randomized, experimental trial</li> <li>2. Cohort study</li> <li>3. Case – control study</li> <li>4. Interrupted time series with a control group</li> </ol> |
| III-3   | A comparative study without concurrent controls: <ol style="list-style-type: none"> <li>1. Historical control study</li> <li>2. Two or more single arm study</li> <li>3. Interrupted time series without a parallel control group</li> </ol>             |
| IV      | Case series with either post-test or pre–test/post–test outcomes                                                                                                                                                                                         |

Merlin T, Weston A, Tooher R. Extending an evidence hierarchy to include topics other than treatment: revising the Australian “levels of evidence”. BMC Med. Res. Methodol. 2009;9:34.
